# Supplementary material for: Effect of shear flow on the hydrodynamic drag force of a spherical particle near a wall evaluated using optical tweezers and microfluidics
Source: Royal Society of Chemistry journal article supplement (doi:10.1039/d1sm00876e), 2021-01-01
Supplement: d1sm00876e1.pdf [file d1sm00876e1.pdf]

## Supplementary Figures

Lester C. Geonzon, Motoyoshi Kobayashi †, Yasuhisa Adachi

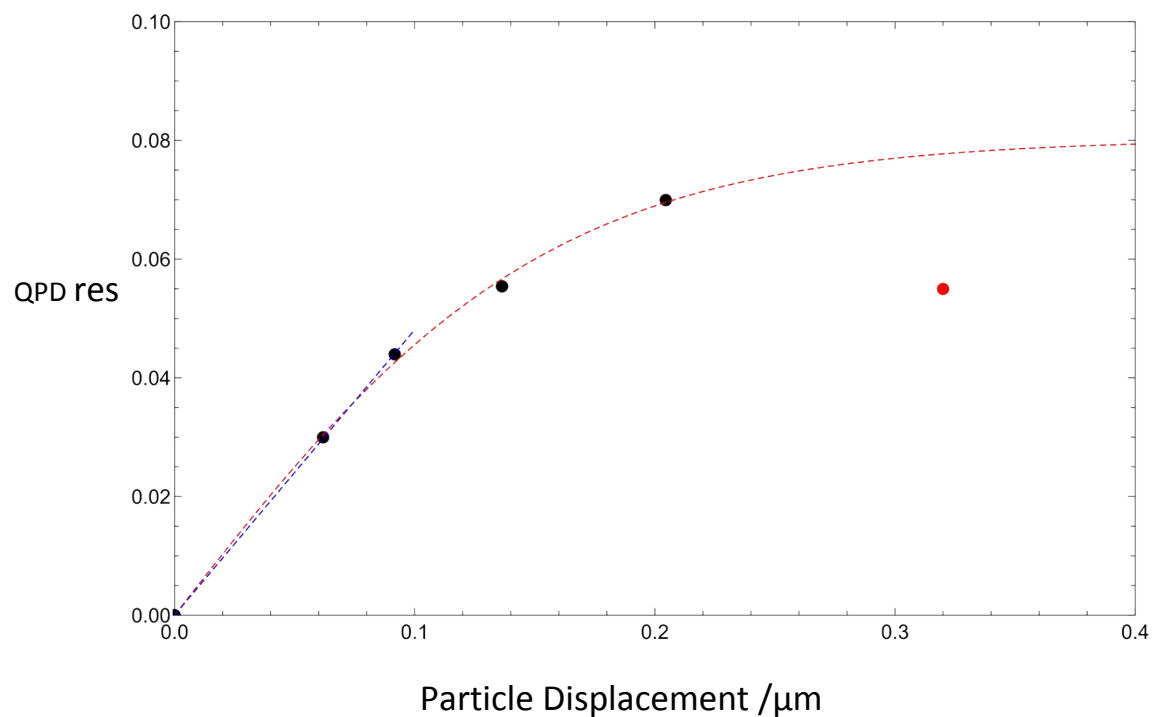

Supplementary Figure 1. Calibration line for the QPD voltage output versus particle position. Blue dashed line is for the line fitting at small displacement.
